# Supplementary material
Source: PubMed Central journal article supplement (PMC4967398)
Supplement: NIHMS765183-supplement-01.pdf [file NIHMS765183-supplement-01.pdf]

## SUPPLEMENTAL DATA

**Supplemental Table 1.** Baseline characteristics of entire cohort compared to those who attended a postpartum visit

|                             | <b>Attended Postpartum Visit (N=437)</b> | <b>Did Not Attend Postpartum Visit (N=217)</b> | <b>p-value</b> |
|-----------------------------|------------------------------------------|------------------------------------------------|----------------|
| Age, mean in years, sd      | 23.7, 4.2                                | 23.6, 4.4                                      | 0.72           |
| Race (%)                    |                                          |                                                | 0.02           |
| Black                       | 294 (67)                                 | 120 (55)                                       |                |
| White                       | 136 (31)                                 | 90 (41)                                        |                |
| Other                       | 9 (2)                                    | 7 (3)                                          |                |
| Married (%)                 | 163 (37)                                 | 74 (34)                                        | 0.40           |
| Education (%)               |                                          |                                                | 0.37           |
| Less than HS                | 37 (9)                                   | 23 (11)                                        |                |
| HS or GED                   | 220 (50)                                 | 106 (49)                                       |                |
| College +                   | 180 (41)                                 | 86 (40)                                        |                |
| Income (%)                  |                                          |                                                | < 0.01         |
| < \$20,000                  | 250 (57)                                 | 89 (41)                                        |                |
| \$20,000-\$49,999           | 86 (20)                                  | 49 (23)                                        |                |
| > \$50,000                  | 28 (6)                                   | 9 (4)                                          |                |
| Unknown                     | 73 (17)                                  | 70 (32)                                        |                |
| Insurance (%)               |                                          |                                                | 0.03           |
| Private                     | 43 (10)                                  | 23 (11)                                        |                |
| Medicaid                    | 268 (62)                                 | 108 (50)                                       |                |
| None at enroll              | 118 (27)                                 | 84 (39)                                        |                |
| Smoking (lifetime) (%)      | 191 (44)                                 | 100 (46)                                       | 0.56           |
| Nulliparous (%)             | 334 (76)                                 | 176 (81)                                       | 0.17           |
| Parity, mean, sd            | 0.36, 0.77                               | 0.24, 0.57                                     | 0.04           |
| Pre-pregnancy BMI, mean, sd | 32.3, 7.6                                | 32.4, 8.8                                      | 0.88           |
| Preterm Birth (<37wks) (%)  | 48 (11)                                  | 24 (11)                                        | 0.98           |
| Preeclampsia (%)            | 38 (9)                                   | 16 (7)                                         | 0.56           |
| Gestational HTN (%)         | 50 (11)                                  | 23 (11)                                        | 0.74           |
| Gestational diabetes (%)    | 13 (3)                                   | 5 (2)                                          | 0.62           |

sd=standard deviation; HS=high school; GED=general educational development; BMI=body mass index; HTN=hypertension
